# Supplementary material for: Evolutionary Characterization of tubulin Gene Family in the Desert Biomass Willow (Salix psammophila) and Expression of the β-tubulin Gene SpsTUB10 during Different Stresses
Source: MDPI journal article supplement (doi:10.3390/f15040696), 2024-04-13
Supplement: s1 [file s1]

**Table S1** The characteristic summary of three plant types within *Salix psammophila*.

| ID | Clone<br>number | Clone code | Plant types  | Crown-height<br>ratio | Height (m) | Crown width<br>(east-west, m) | Crown<br>(south-north, m) | Mean crown (m) |
|----|-----------------|------------|--------------|-----------------------|------------|-------------------------------|---------------------------|----------------|
| 1  | Clone1          | 5–25       | Upright      | 0.58                  | 3          | 1.8                           | 1.7                       | 1.75           |
| 2  | Clone2          | 11 – 30    | Upright      | 0.61                  | 3.3        | 2.2                           | 1.8                       | 2.0            |
| 3  | Clone3          | 12 – 27    | Upright      | 0.61                  | 3.2        | 2.1                           | 1.8                       | 1.95           |
| 4  | Clone1          | 17 – 13    | Intermediate | 0.70                  | 3.7        | 2.6                           | 2.6                       | 2.60           |
| 5  | Clone2          | 17 – 12    | Intermediate | 0.95                  | 2.8        | 2.8                           | 2.5                       | 2.65           |
| 6  | Clone3          | 7 – 35     | Intermediate | 0.96                  | 2.5        | 2.3                           | 2.5                       | 2.40           |
| 7  | Clone1          | 19 – 49    | Scattered    | 1.15                  | 3          | 3.6                           | 3.3                       | 3.45           |
| 8  | Clone2          | 16 – 36    | Scattered    | 1.36                  | 2.5        | 3                             | 3.8                       | 3.40           |
| 9  | Clone3          | 13 – 15    | Scattered    | 1.43                  | 3          | 4.6                           | 4                         | 4.30           |

**Table S2** Organs used for transcriptome sequencing for different plant types within *Salix psammophila*. Bud indicates the terminal bud.

| Plant Type   | Group | Clone1       | Clone2       | Clone3       |
|--------------|-------|--------------|--------------|--------------|
| Upright      | A1    | 5 – 25-Bud   | 11 – 30-Bud  | 12 – 27-Bud  |
|              | A2    | 5 – 25-Stem  | 11 – 30-Stem | 12 – 27-Stem |
|              | A3    | 5 – 25-Root  | 11 – 30-Root | 12 – 27-Root |
| Intermediate | B1    | 17 – 13-Bud  | 17 – 12-Bud  | 7 – 35-Bud   |
|              | B2    | 17 – 13-Stem | 17 – 12-Stem | 7 – 35-Stem  |
|              | B3    | 17 – 13-Root | 17 – 12-Root | 7 – 35-Root  |
| Scattered    | C1    | 19 – 49-Bud  | 16 – 36-Bud  | 13 – 15-Bud  |
|              | C2    | 19 – 49-Stem | 16 – 36-Stem | 13 – 15-Stem |
|              | C3    | 19 – 49-Root | 16 – 36-Root | 13 – 15-Root |

**Table S3** Accession number of the *tubulin* genes used for phylogenetic analysis.

| <i>Populus trichocarpa</i> (NCBI) |           |              | <i>Salix arbutifolia</i><br>NCBI) |          | <i>Salix purpurea</i> (Phytozome 13) |                    | <i>Manihot esculenta</i> (Phytozome 13) |                 | <i>Arabidopsis thaliana</i><br>(NCBI) |             |
|-----------------------------------|-----------|--------------|-----------------------------------|----------|--------------------------------------|--------------------|-----------------------------------------|-----------------|---------------------------------------|-------------|
| ID                                | Gene Name | Gene ID      | Gene Name                         | Gene ID  | Gene Name                            | Gene ID            | Gene Name                               | Gene ID         | Gene Name                             | Gene ID     |
| 1                                 | PtTUA1    | LOC7467233   | CaTUA1                            | KC238439 | SpTUA1                               | Sapur.002G090500.1 | MeTubulin1                              | Manes.08G061700 | AtTUA1                                | AT1G64740.1 |
| 2                                 | PtTUA2    | LOC7463572   | CaTUA2                            | KC238440 | SpTUA2                               | Sapur.003G166900.1 | MeTubulin2                              | Manes.08G024800 | AtTUA2                                | AT1G50010.1 |
| 3                                 | PtTUA3    | LOC7478676   | CaTUA3                            | KC238441 | SpTUA3                               | Sapur.016G172500.1 | MeTubulin3                              | Manes.02G136200 | AtTUA3                                | AT5G19770.1 |
| 4                                 | PtTUA4    | LOC7457696   | CaTUA4                            | KC238442 | SpTUA4                               | Sapur.001G003500.1 | MeTubulin4                              | Manes.02G123600 | AtTUA4                                | AT1G04820.1 |
| 5                                 | PtTUA5    | LOC7478755   | CaTUA5                            | KC238443 | SpTUA5                               | Sapur.009G066800.1 | MeTubulin5                              | Manes.05G200200 | AtTUA5                                | AT5G19780.1 |
| 6                                 | PtTUA6    | LOC7489664   | CaTUA6                            | KC238444 | SpTUA6                               | Sapur.013G052700.1 | MeTubulin6                              | Manes.05G025900 | AtTUA6                                | AT4G14960.2 |
| 7                                 | PtTUA7    | LOC7482463   | CaTUA7                            | KC238445 | SpTUA7                               | Sapur.017G067300.1 | MeTubulin7                              | Manes.05G147000 | AtTUB1                                | AT1G75780.1 |
| 8                                 | PtTUA8    | LOC7491044   | CaTUA8                            | KC238446 | SpTUA8                               | Sapur.019G035200.1 | MeTubulin8                              | Manes.13G106300 | AtTUB2                                | AT5G62690.1 |
| 9                                 | PtTUB1    | LOC7468015   | CaTUB1                            | KC243688 | SpTUB1                               | Sapur.016G138000.1 | MeTubulin9                              | Manes.09G100400 | AtTUB3                                | AT5G62700.1 |
| 10                                | PtTUB2    | LOC7481503   | CaTUB2                            | KC243693 | SpTUB2                               | Sapur.009G029500.1 | MeTubulin10                             | Manes.09G055800 | AtTUB4                                | AT5G44340.1 |
| 11                                | PtTUB3    | LOC7478050   | CaTUB3                            | KC243687 | SpTUB3                               | Sapur.001G086500.1 | MeTubulin11                             | Manes.09G140200 | AtTUB5                                | AT1G20010.1 |
| 12                                | PtTUB4    | LOC7465852   | CaTUB4                            | KC243682 | SpTUB4                               | Sapur.003G090100.1 | MeTubulin12                             | Manes.06G058600 | AtTUB6                                | AT5G12250.1 |
| 13                                | PtTUB5    | LOC7487287   | CaTUB5                            | KC243698 | SpTUB5                               | Sapur.006G078000.1 | MeTubulin13                             | Manes.06G007200 | AtTUB7                                | AT2G29550.1 |
| 14                                | PtTUB6    | LOC7487442   | CaTUB6                            | KC243679 | SpTUB6                               | Sapur.016G094800.1 | MeTubulin14                             | Manes.06G147900 | AtTUB8                                | AT5G23860.1 |
| 15                                | PtTUB7    | LOC7471684   | CaTUB7                            | KC243685 | SpTUB7                               | Sapur.016G301900.1 | MeTubulin15                             | Manes.15G108500 | AtTUB9                                | AT4G20890.1 |
| 16                                | PtTUB8    | LOC18103507  | CaTUB8                            | KC243697 | SpTUB8                               | Sapur.011G119600.1 | MeTubulin16                             | Manes.01G249000 |                                       |             |
| 17                                | PtTUB9    | LOC7472769   | CaTUB9                            | KC243686 | SpTUB9                               | Sapur.001G085400.1 | MeTubulin17                             | Manes.01G061400 |                                       |             |
| 18                                | PtTUB10   | LOC7465861   | CaTUB10                           | KC243683 | SpTUB10                              | Sapur.003G091100.1 | MeTubulin18                             | Manes.01G166100 |                                       |             |
| 19                                | PtTUB11   | LOC7486729   | CaTUB11                           | KC243690 | SpTUB13                              | Sapur.016G158100.1 | MeTubulin19                             | Manes.14G124600 |                                       |             |
| 20                                | PtTUB12   | LOC7462497   | CaTUB12                           | KC243696 | SpTUB14                              | Sapur.009G052100.1 | MeTubulin20                             | Manes.03G135500 |                                       |             |
| 21                                | PtTUB13   | LOC105126006 | CaTUB13                           | KC243694 | SpTUB15                              | Sapur.016G158200.1 | MeTubulin21                             | Manes.03G098100 |                                       |             |

---

|    |         |             |         |          |         |                    |             |                 |
|----|---------|-------------|---------|----------|---------|--------------------|-------------|-----------------|
| 22 | PtTUB14 | LOC7454884  | CaTUB14 | KC243691 | SpTUB16 | Sapur.009G052200.1 | MeTubulin22 | Manes.10G087300 |
| 23 | PtTUB15 | LOC7480106  | CaTUB15 | KC243695 | SpTUB17 | Sapur.006G025400.1 | MeTubulin23 | Manes.10G087200 |
| 24 | PtTUB16 | LOC18108966 | CaTUB16 | KC243692 | SpTUB18 | Sapur.016G030100.1 |             |                 |
| 25 | PtTUB17 | LOC7479658  | CaTUB17 | KC243684 | SpTUB19 | Sapur.002G015900.1 |             |                 |
| 26 | PtTUB18 | LOC7464075  | CaTUB18 | KC243680 | SpTUB20 | Sapur.005G192400.1 |             |                 |
| 27 | PtTUB19 | LOC7479116  | CaTUB19 | KC243681 |         |                    |             |                 |
| 28 | PtTUB20 | LOC7477677  | CaTUB20 | KC243689 |         |                    |             |                 |

---

**Table S4** Detail information of the sequenced transcriptomes for different organs from the clones of the three plant types.

| Samples        | Raw reads | Clean reads | Clean data<br>(bp) | GC<br>Content(%) | ≥Q30 (%) | Total mapped (%)  | Uniquely<br>mapped (%) | Multiple<br>mapped (%) |
|----------------|-----------|-------------|--------------------|------------------|----------|-------------------|------------------------|------------------------|
| G12 – 27-Bud   | 46639672  | 46406080    | 6926713892         | 44.80            | 91.77    | 37566753 (83.57%) | 33403115 (74.31%)      | 4163638 (9.26%)        |
| H11 – 30-Bud   | 49874082  | 49618266    | 7402843050         | 44.50            | 91.59    | 40066626 (82.69%) | 35744125 (73.77%)      | 4322501 (8.92%)        |
| J5 – 25-Bud    | 40902996  | 40708318    | 6063120948         | 44.95            | 92.37    | 32620836 (83.25%) | 28972565 (73.94%)      | 3648271 (9.31%)        |
| G12 – 27-shoot | 41508676  | 41261368    | 6162859751         | 44.18            | 91.42    | 34034494 (82.67%) | 30210074 (73.38%)      | 3824420 (9.29%)        |
| H11 – 30-shoot | 48672594  | 48337300    | 7217628104         | 44.23            | 91.21    | 39549533 (81.94%) | 35155014 (72.83%)      | 4394519 (9.10%)        |
| J5 – 25-shoot  | 43368666  | 43135998    | 6427665968         | 44.39            | 91.72    | 35225790 (81.79%) | 31286616 (72.64%)      | 3939174 (9.15%)        |
| G12 – 27-Root  | 40742408  | 40526754    | 6046240497         | 44.19            | 91.86    | 33462833 (83.17%) | 29859986 (74.21%)      | 3602847 (8.95%)        |
| H11 – 30-Root  | 42270446  | 42062374    | 6279087121         | 44.33            | 91.69    | 35863074 (85.44%) | 31930093 (76.07%)      | 3932981 (9.37%)        |
| J5 – 25-Root   | 44508702  | 44306080    | 6616871584         | 44.38            | 92.06    | 37703210 (85.29%) | 33454894 (75.68%)      | 4248316 (9.61%)        |
| D7 – 35-Bud    | 55700008  | 55424934    | 8256278468         | 44.66            | 91.98    | 45541954 (83.64%) | 40517540 (74.41%)      | 5024414 (9.23%)        |
| E17 – 12-Bud   | 46413642  | 46176498    | 6863291065         | 44.52            | 91.74    | 36960078 (81.55%) | 32813839 (72.40%)      | 4146239 (9.15%)        |
| F17 – 13-Bud   | 52306386  | 52000898    | 7758687647         | 44.61            | 91.56    | 42262625 (83.32%) | 37646886 (74.22%)      | 4615739 (9.10%)        |
| D7 – 35- shoot | 42820444  | 42602240    | 6354732426         | 44.34            | 91.79    | 35378133 (83.22%) | 31405374 (73.87%)      | 3972759 (9.34%)        |
| E17 – 12-shoot | 52100372  | 51818444    | 7723231977         | 44.23            | 91.68    | 41672233 (80.64%) | 36661044 (70.94%)      | 5011189 (9.70%)        |
| F17 – 13-shoot | 53122022  | 52838666    | 7884172331         | 44.40            | 91.81    | 44079804 (83.58%) | 39057193 (74.06%)      | 5022611 (9.52%)        |
| D7 – 35-Root   | 40352560  | 40144920    | 5992465970         | 44.43            | 92.17    | 34306704 (85.74%) | 30490271 (76.20%)      | 3816433 (9.54%)        |
| E17 – 12-Root  | 44626744  | 44369948    | 6613113455         | 44.63            | 91.65    | 37560732 (85.44%) | 33320050 (75.79%)      | 4240682 (9.65%)        |
| F17 – 13-Root  | 50549028  | 50310526    | 7504818672         | 44.57            | 91.86    | 43051449 (86.06%) | 38160895 (76.28%)      | 4890554 (9.78%)        |
| A13 – 15-Bud   | 42364722  | 42094584    | 6272978155         | 44.04            | 91.54    | 34286375 (81.95%) | 30727154 (73.44%)      | 3559221 (8.51%)        |
| B16 – 36-Bud   | 47180942  | 46805734    | 6980639794         | 44.64            | 91.01    | 38191438 (82.96%) | 33986287 (73.83%)      | 4205151 (9.13%)        |
| C19 – 49-Bud   | 43306150  | 43062706    | 6426896922         | 44.64            | 91.64    | 34952764 (82.96%) | 31106976 (73.83%)      | 3845788 (9.13%)        |

|                       |          |            |            |           |           |                   |                   |                 |
|-----------------------|----------|------------|------------|-----------|-----------|-------------------|-------------------|-----------------|
| <b>A13 – 15-shoot</b> | 43628016 | 43395440   | 6470910433 | 44.31     | 91.79     | 35807774 (82.76%) | 31800568 (73.50%) | 4007206 (9.26%) |
| <b>B16 – 36-shoot</b> | 43461428 | 43246212   | 6456675235 | 44.39     | 91.76     | 36035579 (83.51%) | 32038947 (74.25%) | 3996632 (9.26%) |
| <b>C19 – 49-shoot</b> | 43970108 | 43739114   | 6527316152 | 44.39     | 91.91     | 36140643 (82.77%) | 32076268 (73.47%) | 4064375 (9.31%) |
| <b>A13 – 15-Root</b>  | 47243528 | 47022196   | 7017842949 | 44.57     | 91.73     | 40267743 (85.87%) | 35711570 (76.16%) | 4556173 (9.72%) |
| <b>B16 – 36-Root</b>  | 50518430 | 50256956   | 7503674946 | 45.04     | 91.77     | 41215730 (85.70%) | 36560978 (76.02%) | 4654752 (9.68%) |
| <b>C19 – 49-Root</b>  | 50023056 | 49725374   | 7418216858 | 44.54     | 91.41     | 42423670 (85.62%) | 37673546 (76.04%) | 4750124 (9.59%) |
| <b>Total</b>          |          | 1241397928 |            | 44.477778 | 91.721852 |                   |                   |                 |

**Table S5** Information on primers used in this study.

| Primer       | Primer sequence (5'-3')                                |
|--------------|--------------------------------------------------------|
| SpsTUB10-F   | GGGGACAACCTGTACAAAAAAGTTGGAATGAGAGAAATCCTCCATATT       |
| SpsTUB10-R   | GGCGGCCCGCACAACTTTGTACAAGAAAGTTGGGTATTAGTTGTCCAGTGCCTC |
| q-SpsTUB10-F | ATGAGTGGAGTGACGTGCTG                                   |
| q-SpsTUB10-R | CATCCCACATTGCTGTGTC                                    |

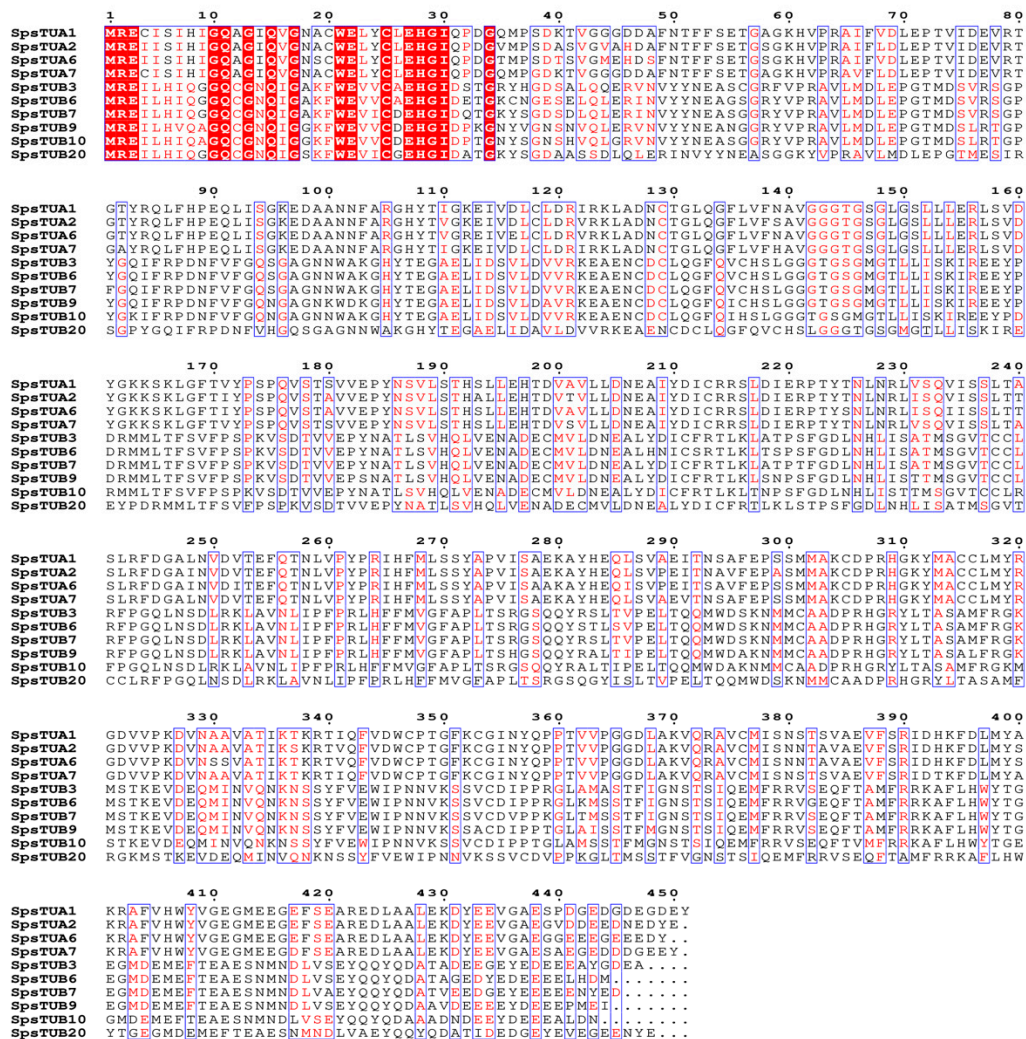

Figure S1 Alignment of the amino acid sequences of the tubulin genes within *Salix psammophila*.



```

1   ATGAGAGAAATCCTCCATATTCAAGCCGGTCAATGTGGTAACCAGATTGGTGGCAAGTTCTGGGAGGTGGTGTGCGATGAACACGGGATT
1   M R E I L H I Q A G Q C G N Q I G G K F W E V V C D E H G I
91  GATCCAACAGGGAATTACTCTGGCAACTCTCAGTTTCAGTTGGGAGGGTCAATGTTTACTACAATGAGGCTAGTGGTGGCCGCTATGTG
31  D P T G N Y S G N S H V Q L G R V N V Y Y N E A S G G R Y V
181 CCCAGGGCTGTCCTGATGGACCTCGAGCCAGGACCATGGACAGCTTGAGGACTGGTCCTTATGGGAAAATCTTCAGGCCTGACAACTTT
61  P R A V L M D L E P G T M D S L R T G P Y G K I F R P D N F
271 GTTTTCGGCCAGAATGGAGCTGGAAATAACTGGGCTAAGGGACATTACACTGAGGGAGCGGAAGTATCGACTCTGTTCTTGATGTTGTT
91  V F G Q N G A G N N W A K G H Y T E G A E L I D S V L D V V
361 CGAAAGAAGCTGAGAATTGTGATTGCTTGCAAGGCTTCCAATCTGACATTCTCTGGGAGGTGGAAGTGGATCAGGAATGGGGACTCG
121 R K E A E N C D C L Q G F Q I * H S L G G G T G S G M G T L
451 CTTATATCAAAGATCAGGGAAGAATACCTGACAGGATGATGCTGACTTTCTCAGTATTTCCTCCCTAAGGTTTCTGATACTGTGGTC
151 L I S K I R E E Y P D R M M L T F S V F P S P K V S D T V V
541 GAGCCTTACAATGCCACCTCTCTGTACACCAACTGGTTGAAAATGTGATGAATGTATGGTCCTTGACAACGAAGCTCTCTACGATATC
181 E P Y N A T L S V H Q L V E N A D E C M V L D N E A L Y D I
631 TGCTTTCGAAGCTCTCAAGCTCACCACCCAAGCTTTGGTGATCTCAACCATCTTATCTCAACGACCATGAGTGGAGTGACGTGCTGCCTT
211 C F R T L K L T N P S F G D L N H L I S T T M S G V T C C L
721 CGATTCCGGGTCAACTCAACTCCGATCTTCGAAAACAGCGTGAACCTAATCCCTTCCACGCTCCATTCTTCATGGTTGGTTT
241 R F P G Q L N S D L R K L A V N L I P F P R L H F F M V G F
811 GCACCATTAACATCCCGGGGCTCGCAGCAGTACCGGCCCTAACCATCCCGGAGCTGACACAGCAAATGTGGGATGCTAAAAACATGATG
271 A P L T S R G S Q Q Y R A L T I P E L T Q Q M W D A K N M M
901 TGTGCAGTGACCTCGGCATGGAAGGTACTTAAGTGCCTCAGCCATGTTCCGAGGCAAAATGAGCACCAAGGAAGTCGATGAACAGATG
301 C A A D P R H G R Y L T A S A M F R G K M S T K E V D E Q M
991 ATAAATGTGCAGAACAAAGAACTCATCTACTTTGTGGAGTGGATTCTAATAATGTAATAAAGTGGTTGTGACATCCACCAACCGGG
331 I N V Q N K N S S Y F V E W I P N N V K S S V C D I P P T G

1081 CTGGCAATGTCATCGACATTGATGGGAATTCTACCTCCATTCAAGAGATGTTTAGAGTGTTCGGAACAATTACAGTCATGTTTAGG
361 L A M S S T F M G N S T S I Q E M F R R V S E Q F T V M F R
1171 AGAAAGGCGTTTTTGCAATTGGTACACCGGGAAGGAATGGATGAAATGGAGTTTACTGAGGCTGAAAGCAACATGAACGATTGGTTTCT
391 R K A F L H W Y T G E G M D E M E F T E A E S N M N D L V S
1261 GAATATCAACAATCAAGATGCCGCTGCGGATAATGACGAGGAGTATGATGAAGAAGAGGCACTGGACAACATAA
421 E Y Q Q Y Q D A A A D N D E E Y D E E E A L D N *

```

**Figure S2** Full-length of the cDNA of the *SpsTUB10* and its amino acid sequence.

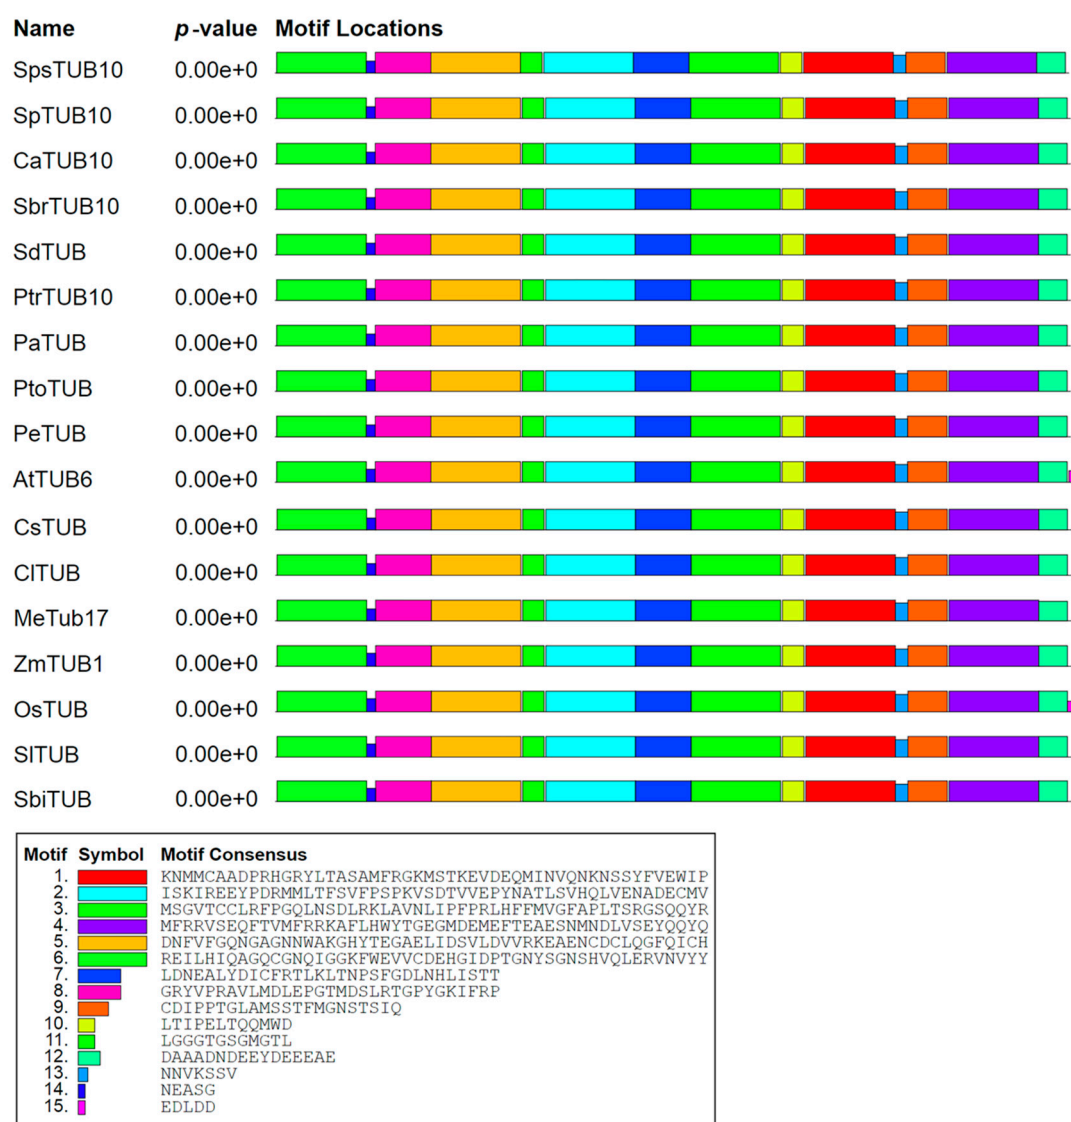

**Figure S3** Homologous structure alignment of the amino acid sequences of *TUB* genes. Bar=0.1 substitutions per site. *TUB* gene accessions retrieved from NCBI and Phytozome 13: *Salix psammophila* SpsTUB10, *Salix purpurea* SpTUB, *Salix arbutifolia* CaTUB, *Salix brachista* SbrTUB, *Salix dunnii* SdTUB, *Populus trichocarpa* PtrTUB, *Populus alba* PaTUB, *Populus tomentosa* PtoTUB, *Populus euphratica* PeTUB, *Arabidopsis thaliana* AtTUB6, *Camellia sinensis* CsTUB, *Camellia lanceoleosa* CITUB, *Manihot esculenta* MeTub17, *Zea mays* ZmTUB1, *Oryza sativa* OsTUB, *Solanum lycopersicum* SITUB, and *Sorghum bicolor* SbiTUB. Motif symbol and motif consensus shown in the end.

BAD AVG GOOD

|           |   |    |
|-----------|---|----|
| SpS1TUB10 | : | 99 |
| SpTUB10   | : | 99 |
| CaTUB10   | : | 99 |
| SbrTUB10  | : | 99 |
| SdTUB     | : | 99 |
| PtrTUB10  | : | 99 |
| PaTUB     | : | 99 |
| PtoTUB    | : | 99 |
| PeTUB     | : | 99 |
| AtTUB6    | : | 99 |
| CsTUB     | : | 99 |
| CTUB      | : | 99 |
| MeTub17   | : | 99 |
| ZmTUB1    | : | 99 |
| OsTUB     | : | 99 |
| SLTUB     | : | 99 |
| SbiTUB    | : | 99 |
| cons      | : | 99 |

|                              |   |                              |                                                                                          |    |
|------------------------------|---|------------------------------|------------------------------------------------------------------------------------------|----|
| SpsTUB10                     | 1 | MREI LHTIQA GCGN IGTGGK FWEV | CDEHGD IPTGTG NYS GNSH VQL ERNV NYNE ASGGR VY PRAV L HMLEP GTMDS LRTG PYGKI FRPDM VFVGNG | 96 |
| CaTUB10                      | 1 | MREI LHTIQA GCGN IGTGGK FWEV | CDEHGD IPTGTG NYS GNSH VQL ERNV NYNE ASGGR VY PRAV L HMLEP GTMDS LRTG PYGKI FRPDM VFVGNG | 96 |
| CaTUB10                      | 1 | MREI LHTIQA GCGN IGTGGK FWEV | CDEHGD IPTGTG NYS GNSH VQL ERNV NYNE ASGGR VY PRAV L HMLEP GTMDS LRTG PYGKI FRPDM VFVGNG | 96 |
| SrTUB10                      | 1 | MREI LHTIQA GCGN IGTGGK FWEV | CDEHGD IPTGTG NYS GNSH VQL ERNV NYNE ASGGR VY PRAV L HMLEP GTMDS LRTG PYGKI FRPDM VFVGNG | 96 |
| SdTUB                        | 1 | MREI LHTIQA GCGN IGTGGK FWEV | CDEHGD IPTGTG NYS GNSH VQL ERNV NYNE ASGGR VY PRAV L HMLEP GTMDS LRTG PYGKI FRPDM VFVGNG | 96 |
| PtTUB10                      | 1 | MREI LHTIQA GCGN IGTGGK FWEV | CDEHGD IPTGTG NYS GNSH VQL ERNV NYNE ASGGR VY PRAV L HMLEP GTMDS LRTG PYGKI FRPDM VFVGNG | 96 |
| PaTUB                        | 1 | MREI LHTIQA GCGN IGTGGK FWEV | CDEHGD IPTGTG NYS GNSH VQL ERNV NYNE ASGGR VY PRAV L HMLEP GTMDS LRTG PYGKI FRPDM VFVGNG | 96 |
| PoTUB                        | 1 | MREI LHTIQA GCGN IGTGGK FWEV | CDEHGD IPTGTG NYS GNSH VQL ERNV NYNE ASGGR VY PRAV L HMLEP GTMDS LRTG PYGKI FRPDM VFVGNG | 96 |
| PeTUB                        | 1 | MREI LHTIQA GCGN IGTGGK FWEV | CDEHGD IPTGTG NYS GNSH VQL ERNV NYNE ASGGR VY PRAV L HMLEP GTMDS LRTG PYGKI FRPDM VFVGNG | 96 |
| AtTUB6                       | 1 | MREI LHTIQA GCGN IGTGGK FWEV | CDEHGD IPTGTG NYS GNSH VQL ERNV NYNE ASGGR VY PRAV L HMLEP GTMDS LRTG PYGKI FRPDM VFVGNG | 96 |
| CsTUB                        | 1 | MREI LHTIQA GCGN IGTGGK FWEV | CDEHGD IPTGTG NYS GNSH VQL ERNV NYNE ASGGR VY PRAV L HMLEP GTMDS LRTG PYGKI FRPDM VFVGNG | 96 |
| MREI LHTIQA GCGN IGTGGK FWEV | 1 | MREI LHTIQA GCGN IGTGGK FWEV | CDEHGD IPTGTG NYS GNSH VQL ERNV NYNE ASGGR VY PRAV L HMLEP GTMDS LRTG PYGKI FRPDM VFVGNG | 96 |
| MeTub17                      | 1 | MREI LHTIQA GCGN IGTGGK FWEV | CDEHGD IPTGTG NYS GNSH VQL ERNV NYNE ASGGR VY PRAV L HMLEP GTMDS LRTG PYGKI FRPDM VFVGNG | 96 |
| ZmTUB1                       | 1 | MREI LHTIQA GCGN IGTGGK FWEV | CDEHGD IPTGTG NYS GNSH VQL ERNV NYNE ASGGR VY PRAV L HMLEP GTMDS LRTG PYGKI FRPDM VFVGNG | 96 |
| OsTUB                        | 1 | MREI LHTIQA GCGN IGTGGK FWEV | CDEHGD IPTGTG NYS GNSH VQL ERNV NYNE ASGGR VY PRAV L HMLEP GTMDS LRTG PYGKI FRPDM VFVGNG | 96 |
| SlTUB                        | 1 | MREI LHTIQA GCGN IGTGGK FWEV | CDEHGD IPTGTG NYS GNSH VQL ERNV NYNE ASGGR VY PRAV L HMLEP GTMDS LRTG PYGKI FRPDM VFVGNG | 96 |
| SbTUB1                       | 1 | MREI LHTIQA GCGN IGTGGK FWEV | CDEHGD IPTGTG NYS GNSH VQL ERNV NYNE ASGGR VY PRAV L HMLEP GTMDS LRTG PYGKI FRPDM VFVGNG | 96 |
| cons                         | 1 | *****                        | *****                                                                                    | 96 |

[illegible]

|          |     |                               |                |                     |              |          |             |      |      |
|----------|-----|-------------------------------|----------------|---------------------|--------------|----------|-------------|------|------|
| SpsTUB10 | 192 | VENADECMVLNDNEALDYICFRTLKLTNP | SGDGLNHLISITMS | GVTCCLRFFPGQLNSDRKL | LAVNL1PPRLHF | FMVGFAPL | TSRGSQOYRAL | TIPE | 2877 |
| SptTUB10 | 193 | VENADECMVLNDNEALDYICFRTLKLTNP | SGDGLNHLISITMS | GVTCCLRFFPGQLNSDRKL | LAVNL1PPRLHF | FMVGFAPL | TSRGSQOYRAL | TIPE | 2878 |
| CaTUB10  | 193 | VENADECMVLNDNEALDYICFRTLKLTNP | SGDGLNHLISITMS | GVTCCLRFFPGQLNSDRKL | LAVNL1PPRLHF | FMVGFAPL | TSRGSQOYRAL | TIPE | 2880 |
| SbrTUB10 | 193 | VENADECMVLNDNEALDYICFRTLKLTNP | SGDGLNHLISITMS | GVTCCLRFFPGQLNSDRKL | LAVNL1PPRLHF | FMVGFAPL | TSRGSQOYRAL | TIPE | 2881 |
| SdTUB    | 193 | VENADECMVLNDNEALDYICFRTLKLTNP | SGDGLNHLISITMS | GVTCCLRFFPGQLNSDRKL | LAVNL1PPRLHF | FMVGFAPL | TSRGSQOYRAL | TIPE | 2882 |
| PrTUB10  | 193 | VENADECMVLNDNEALDYICFRTLKLTNP | SGDGLNHLISITMS | GVTCCLRFFPGQLNSDRKL | LAVNL1PPRLHF | FMVGFAPL | TSRGSQOYRAL | TIPE | 2883 |
| PaTUB    | 193 | VENADECMVLNDNEALDYICFRTLKLTNP | SGDGLNHLISITMS | GVTCCLRFFPGQLNSDRKL | LAVNL1PPRLHF | FMVGFAPL | TSRGSQOYRAL | TIPE | 2884 |
| ToTUB    | 193 | VENADECMVLNDNEALDYICFRTLKLTNP | SGDGLNHLISITMS | GVTCCLRFFPGQLNSDRKL | LAVNL1PPRLHF | FMVGFAPL | TSRGSQOYRAL | TIPE | 2885 |
| PeTUB    | 193 | VENADECMVLNDNEALDYICFRTLKLTNP | SGDGLNHLISITMS | GVTCCLRFFPGQLNSDRKL | LAVNL1PPRLHF | FMVGFAPL | TSRGSQOYRAL | TIPE | 2886 |
| AlaTUB6  | 193 | VENADECMVLNDNEALDYICFRTLKLTNP | SGDGLNHLISITMS | GVTCCLRFFPGQLNSDRKL | LAVNL1PPRLHF | FMVGFAPL | TSRGSQOYRAL | TIPE | 2887 |
| CaTUB    | 193 | VENADECMVLNDNEALDYICFRTLKLTNP | SGDGLNHLISITMS | GVTCCLRFFPGQLNSDRKL | LAVNL1PPRLHF | FMVGFAPL | TSRGSQOYRAL | TIPE | 2888 |
| CLTUB    | 193 | VENADECMVLNDNEALDYICFRTLKLTNP | SGDGLNHLISITMS | GVTCCLRFFPGQLNSDRKL | LAVNL1PPRLHF | FMVGFAPL | TSRGSQOYRAL | TIPE | 2889 |
| MeTub17  | 193 | VENADECMVLNDNEALDYICFRTLKLTNP | SGDGLNHLISITMS | GVTCCLRFFPGQLNSDRKL | LAVNL1PPRLHF | FMVGFAPL | TSRGSQOYRAL | TIPE | 2890 |
| ZmTub17  | 193 | VENADECMVLNDNEALDYICFRTLKLTNP | SGDGLNHLISITMS | GVTCCLRFFPGQLNSDRKL | LAVNL1PPRLHF | FMVGFAPL | TSRGSQOYRAL | TIPE | 2891 |
| OsTUB    | 193 | VENADECMVLNDNEALDYICFRTLKLTNP | SGDGLNHLISITMS | GVTCCLRFFPGQLNSDRKL | LAVNL1PPRLHF | FMVGFAPL | TSRGSQOYRAL | TIPE | 2892 |
| SLTUB    | 193 | VENADECMVLNDNEALDYICFRTLKLTNP | SGDGLNHLISITMS | GVTCCLRFFPGQLNSDRKL | LAVNL1PPRLHF | FMVGFAPL | TSRGSQOYRAL | TIPE | 2893 |
| SbTUB10  | 193 | VENADECMVLNDNEALDYICFRTLKLTNP | SGDGLNHLISITMS | GVTCCLRFFPGQLNSDRKL | LAVNL1PPRLHF | FMVGFAPL | TSRGSQOYRAL | TIPE | 2894 |

|          |     |                                        |                |                                         |     |
|----------|-----|----------------------------------------|----------------|-----------------------------------------|-----|
| SpsTUB10 | 288 | LTQOMDAKNMCMCAADPRHGRYL TASAMFRGKMSKTE | DEQMINVNQKNSYF | VEWIPNNVKSSVCDIPTGLAMSTFMGNSTIQEMFRVSEQ | 383 |
| SptUB10  | 289 | LTQOMDAKNMCMCAADPRHGRYL TASAMFRGKMSKTE | DEQMINVNQKNSYF | VEWIPNNVKSSVCDIPTGLAMSTFMGNSTIQEMFRVSEQ | 384 |
| CapTUB10 | 289 | LTQOMDAKNMCMCAADPRHGRYL TASAMFRGKMSKTE | DEQMINVNQKNSYF | VEWIPNNVKSSVCDIPTGLAMSTFMGNSTIQEMFRVSEQ | 384 |
| CatTUB10 | 289 | LTQOMDAKNMCMCAADPRHGRYL TASAMFRGKMSKTE | DEQMINVNQKNSYF | VEWIPNNVKSSVCDIPTGLAMSTFMGNSTIQEMFRVSEQ | 384 |
| SdTUB    | 289 | LTQOMDAKNMCMCAADPRHGRYL TASAMFRGKMSKTE | DEQMINVNQKNSYF | VEWIPNNVKSSVCDIPTGLAMSTFMGNSTIQEMFRVSEQ | 384 |
| PrtTUB10 | 289 | LTQOMDAKNMCMCAADPRHGRYL TASAMFRGKMSKTE | DEQMINVNQKNSYF | VEWIPNNVKSSVCDIPTGLAMSTFMGNSTIQEMFRVSEQ | 384 |
| PaTUB    | 289 | LTQOMDAKNMCMCAADPRHGRYL TASAMFRGKMSKTE | DEQMINVNQKNSYF | VEWIPNNVKSSVCDIPTGLAMSTFMGNSTIQEMFRVSEQ | 384 |
| PtoTUB   | 289 | LTQOMDAKNMCMCAADPRHGRYL TASAMFRGKMSKTE | DEQMINVNQKNSYF | VEWIPNNVKSSVCDIPTGLAMSTFMGNSTIQEMFRVSEQ | 384 |
| PeTUB    | 289 | LTQOMDAKNMCMCAADPRHGRYL TASAMFRGKMSKTE | DEQMINVNQKNSYF | VEWIPNNVKSSVCDIPTGLAMSTFMGNSTIQEMFRVSEQ | 384 |
| AtTUB6   | 289 | LTQOMDSKNMCMCAADPRHGRYL TASAMFRGKMSKTE | DEQMINVNQKNSYF | VEWIPNNVKSSVCDIAPGLSMASTFGNSTIQEMFRVSEQ | 384 |
| CsTUB    | 289 | LTQOMDAKNMCMCAADPRHGRYL TASAMFRGKMSKTE | DEQMINVNQKNSYF | VEWIPNNVKSSVCDIPTGLAMSTFMGNSTIQEMFRVSEQ | 384 |
| ClTUB    | 289 | LTQOMDAKNMCMCAADPRHGRYL TASAMFRGKMSKTE | DEQMINVNQKNSYF | VEWIPNNVKSSVCDIPTGLAMSTFMGNSTIQEMFRVSEQ | 384 |
| MeTUB17  | 289 | LTQOMDAKNMCMCAADPRHGRYL TASAMFRGKMSKTE | DEQMINVNQKNSYF | VEWIPNNVKSSVCDIPTGLAMSTFMGNSTIQEMFRVSEQ | 384 |
| ZmTUB1   | 289 | LTQOMDAKNMCMCAADPRHGRYL TASAMFRGKMSKTE | DEQMLNVNQNKSIF | VEWIPNNKVTCTCDIPTGLKMASTFGNSTIQEMFRVSEQ | 384 |
| AtTUB    | 289 | LTQOMDAKNMCMCAADPRHGRYL TASAMFRGKMSKTE | DEQMLNVNQNKSIF | VEWIPNNKVTCTCDIPTGLKMASTFGNSTIQEMFRVSEQ | 384 |
| SbTUB1   | 289 | LTQOMDAKNMCMCAADPRHGRYL TASAMFRGKMSKTE | DEQMLNVNQNKSIF | VEWIPNNKVTCTCDIPTGLKMASTFGNSTIQEMFRVSEQ | 384 |
| cons     | 289 | *****                                  | *****          | *****                                   | 384 |

|          |     |                                                     |           |       |     |
|----------|-----|-----------------------------------------------------|-----------|-------|-----|
| SpSUTB10 | 384 | FTVMFRKFAFLHWYTGEGDMEFTAEASNNDLVSEYQQYQDAAADNDEEYD  | -EEA----  | LD--N | 443 |
| SptB10   | 385 | FTVMFRKFAFLHWYTGEGDMEFTAEASNNDLVSEYQQYQDAAADNDEEYD  | -EEA----  | LD--N | 444 |
| CaTb10   | 385 | FTVMFRKFAFLHWYTGEGDMEFTAEASNNDLVSEYQQYQDAAADNDEEYD  | -EEA----  | LD--N | 444 |
| SpTb10   | 385 | FTVMFRKFAFLHWYTGEGDMEFTAEASNNDLVSEYQQYQDAAADNDEEYD  | -EEA----  | LD--N | 444 |
| dTbTb    | 385 | FTVMFRKFAFLHWYTGEGDMEFTAEASNNDLVSEYQQYQDAAADNDEEYD  | -EEA----  | LD--N | 444 |
| PtUTb10  | 385 | FTVMFRKFAFLHWYTGEGDMEFTAEASNNDLVSEYQQYQDAAADNDEEYD  | -EEI----  | VE--N | 444 |
| PaTbTb   | 385 | FTVMFRKFAFLHWYTGEGDMEFTAEASNNDLVSEYQQYQDAAADNDEEYD  | -EEA----  | ME--N | 444 |
| PtOTbTb  | 385 | FTVMFRKFAFLHWYTGEGDMEFTAEASNNDLVSEYQQYQDAAADNDEEYD  | -EEA----  | VE--N | 444 |
| PeTbTb   | 385 | FTVMFRKFAFLHWYTGEGDMEFTAEASNNDLVSEYQQYQDAAADNDEEYD  | -EEA----  | ME--N | 444 |
| AttB6    | 385 | FTAMFRKFAFLHWYTGEGDMEFTAEASNNDLVSEYQQYQDAADNDEGEYEE | -DEEETLH- | E--   | 449 |
| CSUTb    | 385 | FTVMFRKFAFLHWYTGEGDMEFTAEASNNDLVSEYQQYQDAADNDEGEYEE | -DEEETLH- | E--   | 449 |
| CLTbTb   | 385 | FTVMFRKFAFLHWYTGEGDMEFTAEASNNDLVSEYQQYQDAADNDEGEYEE | -DEEETLH- | E--   | 449 |
| MeTbTb17 | 385 | FTVMFRKFAFLHWYTGEGDMEFTAEASNNDLVSEYQQYQDAADNDEGEYEE | -DEEETLH- | E--   | 449 |
| ZmTb17   | 385 | FTAMFRKFAFLHWYTGEGDMEFTAEASNNDLVSEYQQYQDAADNDEGEYEE | -DEEETLH- | E--   | 449 |
| MeTb17   | 385 | FTAMFRKFAFLHWYTGEGDMEFTAEASNNDLVSEYQQYQDAADNDEGEYEE | -DEEETLH- | E--   | 449 |
| SLTbTb   | 385 | FTAMFRKFAFLHWYTGEGDMEFTAEASNNDLVSEYQQYQDAADNDEGEYEE | -DEEETLH- | E--   | 449 |
| SbTbTbTb | 385 | FTAMFRKFAFLHWYTGEGDMEFTAEASNNDLVSEYQQYQDAADNDEGEYEE | -DEEETLH- | E--   | 449 |
| cons     | 385 | *****                                               | *****     | ***** | 452 |

**Figure S4** Amino acid sequence alignment of the SpsTUB10 with other 16 TUB homologous genes from different plant species.
